# Supplementary material for: Causes of Death in Stray Cat Colonies of Milan: A Five-Year Report
Source: MDPI journal article supplement (doi:10.3390/ani11113308), 2021-11-19
Supplement: s1 [file s1]

Table S1

| Year | Protocol number | Sex    | Neutering | Age          | Cause of death                     | Body condition |
|------|-----------------|--------|-----------|--------------|------------------------------------|----------------|
| 2015 | 153             | Male   | Neutered  | adult        | other                              | ideal          |
| 2016 | 27              | Male   | Neutered  | old          | other                              | ideal          |
| 2014 | 104             | Male   | Neutered  | young        | other                              | ideal          |
| 2016 | 65              | Male   | Neutered  | adult        | other                              | underweight    |
| 2016 | 218             | Male   | Neutered  | adult        | other                              | poor           |
| 2017 | 205             | Female |           | kitten       | other                              | poor           |
| 2015 | 99              | Female |           | young        | pulmonary edema                    | poor           |
| 2016 | 86              | Female |           | not recorded | pulmonary edema                    | ideal          |
| 2016 | 1               | Female | Neutered  | adult        | pulmonary edema                    | ideal          |
| 2017 | 22              | Male   | Neutered  | adult        | pulmonary edema                    | ideal          |
| 2016 | 253             | Male   | Neutered  | old          | pulmonary edema                    | ideal          |
| 2014 | 231             | Female | Neutered  | young        | pulmonary edema                    | ideal          |
| 2016 | 122             | Male   |           | adult        | pulmonary edema                    | emaciated      |
| 2014 | 80              | Male   |           | adult        | pulmonary edema                    | underweight    |
| 2014 | 48              | Male   |           | old          | pulmonary edema                    | poor           |
| 2018 | 150             | Male   |           | kitten       | pulmonary edema                    | poor           |
| 2017 | 148             | Male   |           | old          | inflammatory processes             | ideal          |
| 2017 | 50              | Female | Neutered  | old          | inflammatory processes             | poor           |
| 2016 | 257             | Male   |           | young        | inflammatory processes             | poor           |
| 2016 | 149             | Female |           | kitten       | inflammatory processes (enteritis) | underweight    |
| 2016 | 90              | Male   |           | adult        | inflammatory processes (enteritis) | poor           |
| 2017 | 63              | Female |           | old          | inflammatory processes (enteritis) | poor           |
| 2015 | 104             | Female | Neutered  | old          | inflammatory processes (enteritis) | poor           |
| 2016 | 128             | Female | Neutered  | old          | inflammatory processes             | underweight    |
| 2016 | 107             | Female | Neutered  | old          | inflammatory processes             | poor           |
| 2017 | 109             | Male   |           | kitten       | inflammatory processes             | ideal          |
| 2015 | 172             | Male   | Neutered  | adult        | inflammatory processes (pneumonia) | ideal          |
| 2014 | 177             | Female | Neutered  | adult        | inflammatory processes (pneumonia) |                |
| 2014 | 271             | Female |           | old          | inflammatory processes (pneumonia) | emaciated      |
| 2017 | 156             | Female |           | kitten       | inflammatory processes (pneumonia) | ideal          |
| 2017 | 133             | Male   |           | young        | inflammatory processes (pneumonia) | ideal          |
| 2018 | 80              | Female | Neutered  | old          | inflammatory processes (pneumonia) | emaciated      |
| 2017 | 248             | Male   |           | adult        | inflammatory processes (pneumonia) | emaciated      |
| 2014 | 54              | Female | Neutered  | old          | inflammatory processes (pneumonia) | emaciated      |
| 2016 | 179             | Female | Neutered  | adult        | inflammatory processes (pneumonia) | underweight    |
| 2016 | 184             | Male   | Neutered  | adult        | inflammatory processes (pneumonia) | underweight    |
| 2016 | 177             | Male   |           | kitten       | inflammatory processes (pneumonia) | underweight    |

|             |     |                 |          |                 |                                        |             |
|-------------|-----|-----------------|----------|-----------------|----------------------------------------|-------------|
| <b>2014</b> | 66  | Male            |          | not<br>recorded | inflammatory processes<br>(pneumonia)  | poor        |
| <b>2017</b> | 159 | Male            | Neutered | adult           | inflammatory processes<br>(pneumonia)  | poor        |
| <b>2018</b> | 36  | Female          | Neutered | old             | inflammatory processes<br>(pneumonia)  | poor        |
| <b>2017</b> | 54  | Female          | Neutered | old             | inflammatory processes<br>(pneumonia)  | poor        |
| <b>2017</b> | 147 | Male            |          | kitten          | inflammatory processes<br>(pneumonia)  | poor        |
| <b>2016</b> | 254 | Male            |          | kitten          | inflammatory processes<br>(pneumonia)  | poor        |
| <b>2018</b> | 76  | Female          |          | young           | inflammatory processes<br>(pneumonia)  | poor        |
| <b>2017</b> | 78  | Male            |          | young           | inflammatory processes<br>(pneumonia)  | poor        |
| <b>2015</b> | 211 | Male            |          | not<br>recorded | inflammatory processes<br>(septicemia) | ideal       |
| <b>2016</b> | 213 | Male            | Neutered | adult           | organ failure (heart)                  | ideal       |
| <b>2017</b> | 21  | Female          | Neutered | young           | organ failure (heart)                  | ideal       |
| <b>2015</b> | 17  | Male            | Neutered | old             | organ failure (heart)                  | overweight  |
| <b>2014</b> | 2   | Male            | Neutered | adult           | organ failure (heart)                  | poor        |
| <b>2015</b> | 74  | Male            | Neutered | old             | organ failure (heart)                  | poor        |
| <b>2016</b> | 222 | Female          |          | old             | organ failure (liver)                  | ideal       |
| <b>2017</b> | 110 | Male            |          | adult           | organ failure (liver)                  | emaciated   |
| <b>2016</b> | 125 | Male            |          | old             | organ failure (liver)                  | poor        |
| <b>2016</b> | 21  | Female          | Neutered | old             | organ failure (liver)                  | underweight |
| <b>2015</b> | 128 | Male            | Neutered | old             | organ failure (liver)                  | poor        |
| <b>2016</b> | 114 | Male            | Neutered | adult           | organ failure (liver)                  | overweight  |
| <b>2016</b> | 35  | Female          | Neutered | old             | organ failure (liver)                  | ideal       |
| <b>2018</b> | 151 | Female          |          | old             | organ failure (liver)                  | emaciated   |
| <b>2017</b> | 179 | Male            | Neutered | old             | organ failure (pancreas)               | poor        |
| <b>2018</b> | 127 | Male            | Neutered | adult           | organ failure (kidney)                 | poor        |
| <b>2018</b> | 30  | Female          | Neutered | old             | organ failure (kidney)                 | poor        |
| <b>2015</b> | 42  | Male            | Neutered | old             | organ failure (kidney)                 | poor        |
| <b>2016</b> | 52  | Female          | Neutered | adult           | organ failure (kidney)                 | ideal       |
| <b>2015</b> | 52  | Not<br>recorded |          | old             | organ failure (kidney)                 | ideal       |
| <b>2018</b> | 27  | Male            |          | old             | organ failure (kidney)                 | ideal       |
| <b>2017</b> | 232 | Male            | Neutered | old             | organ failure (kidney)                 | ideal       |
| <b>2016</b> | 68  | Male            | Neutered | old             | organ failure (kidney)                 | ideal       |
| <b>2017</b> | 98  | Male            |          | adult           | organ failure (kidney)                 | emaciated   |
| <b>2017</b> | 158 | Female          |          | old             | organ failure (kidney)                 | emaciated   |
| <b>2014</b> | 251 | Female          |          | old             | organ failure (kidney)                 | emaciated   |
| <b>2018</b> | 17  | Female          | Neutered | old             | organ failure (kidney)                 | emaciated   |
| <b>2017</b> | 89  | Male            |          | old             | organ failure (kidney)                 | emaciated   |
| <b>2016</b> | 170 | Male            |          | old             | organ failure (kidney)                 | emaciated   |
| <b>2016</b> | 204 | Male            | Neutered | old             | organ failure (kidney)                 | emaciated   |
| <b>2016</b> | 106 | Male            | Neutered | old             | organ failure (kidney)                 | emaciated   |
| <b>2018</b> | 112 | Male            | Neutered | old             | organ failure (kidney)                 | underweight |
| <b>2016</b> | 28  | Male            | Neutered | adult           | organ failure (kidney)                 | underweight |
| <b>2014</b> | 14  | Male            | Neutered | old             | organ failure (kidney)                 | underweight |

|             |     |              |          |              |                                                        |             |
|-------------|-----|--------------|----------|--------------|--------------------------------------------------------|-------------|
| <b>2018</b> | 91  | Not recorded |          | old          | organ failure (kidney)                                 | poor        |
| <b>2018</b> | 11  | Female       |          | not recorded | organ failure (kidney)                                 | poor        |
| <b>2017</b> | 94  | Female       |          | adult        | organ failure (kidney)                                 | poor        |
| <b>2015</b> | 199 | Female       | Neutered | adult        | organ failure (kidney)                                 | poor        |
| <b>2016</b> | 126 | Male         | Neutered | adult        | organ failure (kidney)                                 | poor        |
| <b>2018</b> | 94  | Female       | Neutered | old          | organ failure (kidney)                                 | poor        |
| <b>2017</b> | 73  | Female       | Neutered | old          | organ failure (kidney)                                 | poor        |
| <b>2017</b> | 64  | Female       | Neutered | old          | organ failure (kidney)                                 | poor        |
| <b>2017</b> | 53  | Male         |          | old          | organ failure (kidney)                                 | poor        |
| <b>2017</b> | 206 | Male         | Neutered | old          | organ failure (kidney)                                 | poor        |
| <b>2017</b> | 113 | Male         | Neutered | old          | organ failure (kidney)                                 | poor        |
| <b>2016</b> | 152 | Male         | Neutered | old          | organ failure (kidney)                                 | poor        |
| <b>2014</b> | 51  | Male         | Neutered | old          | organ failure (kidney)                                 | poor        |
| <b>2014</b> | 211 | Female       |          | young        | inflammatory processes (feline infectious peritonitis) | ideal       |
| <b>2017</b> | 129 | Male         | Neutered | adult        | inflammatory processes (feline infectious peritonitis) | ideal       |
| <b>2014</b> | 212 | Male         | Neutered | old          | inflammatory processes (feline infectious peritonitis) | ideal       |
| <b>2016</b> | 113 | Male         |          | adult        | inflammatory processes (feline infectious peritonitis) | emaciated   |
| <b>2015</b> | 162 | Male         |          | old          | inflammatory processes (feline infectious peritonitis) | emaciated   |
| <b>2015</b> | 95  | Male         |          | old          | inflammatory processes (feline infectious peritonitis) | emaciated   |
| <b>2018</b> | 149 | Female       | Neutered | adult        | inflammatory processes (feline infectious peritonitis) | underweight |
| <b>2018</b> | 40  | Not recorded |          | adult        | inflammatory processes (feline infectious peritonitis) | overweight  |
| <b>2014</b> | 97  | Female       |          | old          | inflammatory processes (feline infectious peritonitis) | overweight  |
| <b>2017</b> | 152 | Male         | Neutered | not recorded | inflammatory processes (feline infectious peritonitis) | poor        |
| <b>2018</b> | 37  | Male         | Neutered | adult        | inflammatory processes (feline infectious peritonitis) | poor        |
| <b>2014</b> | 207 | Female       |          | old          | inflammatory processes (feline infectious peritonitis) | poor        |
| <b>2014</b> | 210 | Female       |          | kitten       | inflammatory processes (feline infectious peritonitis) | poor        |
| <b>2014</b> | 24  | Female       |          | not recorded | inflammatory processes (feline panleukopenia)          | -           |
| <b>2016</b> | 234 | Female       | Neutered | not recorded | inflammatory processes (feline panleukopenia)          | underweight |
| <b>2017</b> | 211 | Female       |          | kitten       | inflammatory processes (feline panleukopenia)          | poor        |
| <b>2018</b> | 148 | Male         |          | kitten       | inflammatory processes (feline panleukopenia)          | -           |
| <b>2017</b> | 166 | Male         |          | kitten       | inflammatory processes (feline panleukopenia)          | poor        |
| <b>2016</b> | 248 | Male         |          | kitten       | inflammatory processes (feline panleukopenia)          | ideal       |
| <b>2016</b> | 180 | Female       |          | young        | inflammatory processes (feline panleukopenia)          | ideal       |
| <b>2016</b> | 229 | Female       |          | kitten       | inflammatory processes (feline panleukopenia)          | ideal       |

|             |     |              |          |              |                                               |             |
|-------------|-----|--------------|----------|--------------|-----------------------------------------------|-------------|
| <b>2016</b> | 16  | Female       |          | kitten       | inflammatory processes (feline panleukopenia) | ideal       |
| <b>2017</b> | 242 | Female       |          | young        | inflammatory processes (feline panleukopenia) | ideal       |
| <b>2017</b> | 139 | Female       |          | kitten       | inflammatory processes (feline panleukopenia) | underweight |
| <b>2017</b> | 227 | Female       | Neutered | kitten       | inflammatory processes (feline panleukopenia) | underweight |
| <b>2016</b> | 142 | Male         |          | kitten       | inflammatory processes (feline panleukopenia) | underweight |
| <b>2015</b> | 43  | Female       |          | young        | inflammatory processes (feline panleukopenia) | underweight |
| <b>2017</b> | 178 | Female       |          | not recorded | inflammatory processes (feline panleukopenia) | poor        |
| <b>2017</b> | 250 | Female       |          | kitten       | inflammatory processes (feline panleukopenia) | poor        |
| <b>2017</b> | 231 | Female       |          | kitten       | inflammatory processes (feline panleukopenia) | poor        |
| <b>2017</b> | 189 | Female       |          | kitten       | inflammatory processes (feline panleukopenia) | poor        |
| <b>2017</b> | 188 | Female       |          | kitten       | inflammatory processes (feline panleukopenia) | poor        |
| <b>2017</b> | 176 | Female       |          | kitten       | inflammatory processes (feline panleukopenia) | poor        |
| <b>2017</b> | 175 | Female       |          | kitten       | inflammatory processes (feline panleukopenia) | poor        |
| <b>2016</b> | 230 | Female       |          | kitten       | inflammatory processes (feline panleukopenia) | poor        |
| <b>2016</b> | 219 | Female       |          | kitten       | inflammatory processes (feline panleukopenia) | poor        |
| <b>2017</b> | 174 | Male         |          | kitten       | inflammatory processes (feline panleukopenia) | poor        |
| <b>2017</b> | 142 | Male         |          | kitten       | inflammatory processes (feline panleukopenia) | poor        |
| <b>2016</b> | 153 | Male         |          | young        | inflammatory processes (feline panleukopenia) | poor        |
| <b>2016</b> | 147 | Male         |          | young        | inflammatory processes (feline panleukopenia) | poor        |
| <b>2015</b> | 105 | Not recorded |          | not recorded | neoplasia (lymphoma)                          | poor        |
| <b>2015</b> | 2   | Female       | Neutered | not recorded | neoplasia (squamous cell carcinoma)           | -           |
| <b>2018</b> | 15  | Male         |          | adult        | neoplasia (histiocytic sarcoma)               | ideal       |
| <b>2018</b> | 77  | Not recorded |          | old          | neoplasia (osteosarcoma)                      | ideal       |
| <b>2017</b> | 155 | Female       |          | old          | neoplasia (pulmonary adenocarcinoma)          | ideal       |
| <b>2016</b> | 3   | Female       | Neutered | young        | neoplasia (myeloid neoplasms)                 | ideal       |
| <b>2018</b> | 95  | Male         |          | adult        | neoplasia (histiocytic sarcoma)               | emaciated   |
| <b>2014</b> | 39  | Female       | Neutered | old          | neoplasia (fibrosarcoma)                      | emaciated   |
| <b>2016</b> | 71  | Male         | Neutered | old          | neoplasia (oral sarcoma)                      | emaciated   |
| <b>2016</b> | 256 | Female       | Neutered | young        | neoplasia (lymphoma)                          | emaciated   |
| <b>2017</b> | 204 | Female       |          | old          | neoplasia (squamous cell carcinoma)           | underweight |
| <b>2017</b> | 90  | Female       |          | old          | neoplasia (squamous cell carcinoma)           | underweight |
| <b>2015</b> | 210 | Female       | Neutered | old          | neoplasia (lymphoma)                          | underweight |

|             |     |        |          |              |                                             |             |
|-------------|-----|--------|----------|--------------|---------------------------------------------|-------------|
| <b>2018</b> | 23  | Male   | Neutered | old          | neoplasia (squamous cell carcinoma)         | underweight |
| <b>2017</b> | 80  | Male   | Neutered | old          | neoplasia (squamous cell carcinoma)         | underweight |
| <b>2014</b> | 201 | Female | Neutered | old          | neoplasia (ceruminous gland adenocarcinoma) | overweight  |
| <b>2017</b> | 182 | Male   | Neutered | old          | neoplasia (osteosarcoma)                    | overweight  |
| <b>2015</b> | 50  | Male   | Neutered | old          | neoplasia (lymphoma)                        | overweight  |
| <b>2015</b> | 171 | Female |          | not recorded | neoplasia (squamous cell carcinoma)         | poor        |
| <b>2018</b> | 189 | Female | Neutered | adult        | neoplasia (squamous cell carcinoma)         | poor        |
| <b>2015</b> | 98  | Female |          | old          | neoplasia (hepatocarcinoma)                 | poor        |
| <b>2017</b> | 33  | Female | Neutered | old          | neoplasia (lymphoma)                        | poor        |
| <b>2014</b> | 126 | Male   |          | old          | neoplasia                                   | poor        |
| <b>2014</b> | 41  | Male   |          | old          | parasitosis                                 | -           |
| <b>2014</b> | 167 | Female |          | not recorded | parasitosis                                 | underweight |
| <b>2017</b> | 55  | Male   |          | adult        | parasitosis                                 | poor        |
| <b>2015</b> | 173 | Male   |          | kitten       | parasitosis                                 | poor        |
| <b>2016</b> | 203 | Male   |          | young        | parasitosis                                 | poor        |
| <b>2017</b> | 61  | Male   |          | adult        | trauma                                      | overweight  |
| <b>2017</b> | 245 | Female | Neutered | not recorded | trauma                                      | ideal       |
| <b>2017</b> | 183 | Female |          | adult        | trauma                                      | poor        |
| <b>2017</b> | 267 | Male   |          | adult        | trauma                                      | ideal       |
| <b>2017</b> | 130 | Male   |          | kitten       | trauma                                      | underweight |
| <b>2015</b> | 36  | Female |          | young        | trauma                                      | ideal       |
| <b>2014</b> | 67  | Female |          | young        | trauma                                      | -           |
| <b>2018</b> | 107 | Female |          | not recorded | trauma                                      | ideal       |
| <b>2017</b> | 99  | Female |          | adult        | trauma                                      | ideal       |
| <b>2016</b> | 250 | Female | Neutered | not recorded | trauma                                      | ideal       |
| <b>2017</b> | 151 | Male   | Neutered | adult        | trauma                                      | ideal       |
| <b>2016</b> | 121 | Female |          | adult        | trauma                                      | ideal       |
| <b>2017</b> | 135 | Female | Neutered | adult        | trauma                                      | ideal       |
| <b>2017</b> | 76  | Male   |          | adult        | trauma                                      | ideal       |
| <b>2017</b> | 117 | Female |          | kitten       | trauma                                      | ideal       |
| <b>2015</b> | 75  | Female |          | young        | trauma                                      | ideal       |
| <b>2016</b> | 63  | Female |          | young        | trauma                                      | underweight |
| <b>2018</b> | 1   | Male   |          | not recorded | trauma                                      | overweight  |
| <b>2017</b> | 36  | Male   |          | adult        | trauma                                      | overweight  |
| <b>2017</b> | 190 | Male   | Neutered | young        | trauma                                      | overweight  |
| <b>2016</b> | 115 | Female |          | adult        | trauma                                      | poor        |
| <b>2018</b> | 124 | Female | Neutered | old          | trauma                                      | poor        |
| <b>2017</b> | 108 | Male   | Neutered | old          | trauma                                      | poor        |
| <b>2016</b> | 187 | Male   |          | kitten       | trauma                                      | poor        |
| <b>2017</b> | 184 | Female |          | young        | trauma                                      | poor        |
| <b>2015</b> | 100 | Male   |          | young        | trauma                                      | poor        |
